# Supplementary material for: Genome-wide analysis of the AREB/ABF gene lineage in land plants and functional analysis of TaABF3 in Arabidopsis
Source: BMC Plant Biol. 2020 Dec 10;20:558. doi: 10.1186/s12870-020-02783-9 (PMC7731569; doi:10.1186/s12870-020-02783-9)
Supplement: Supplementary file 2 — Additional file 2: Table S1. ABF protein properties and their clade-distributions in land plants. Gene identifiers are obtained from Phytozome database. [file 12870_2020_2783_MOESM2_ESM.xlsx]

## Sheet: Sheet1
Additional file 2: Table S1 ABF protein properties and their clade-distributions in land plants. Gene identifiers are obtained from Phytozome database.
Species	ABF	Gene ID	Protein length (aa)	Molecular Mass (KD)	Theoretical pI	Clade
Aquilegia coerulea	A.coerulea_ABF1	Aqcoe5G151400	485	52953.2	9.74	VII
Arabidopsis lyrata	A.lyrata_ABF5	AL1G53020	413	44380.7	9.56	III
Arabidopsis lyrata	A.lyrata_ABF4	AL7G17380	447	48836.9	8.35	VI
Arabidopsis lyrata	A.lyrata_ABF1	AL1G57160	395	42888.9	9.17	VI
Arabidopsis lyrata	A.lyrata_ABF3	AL8G17940	458	49785.4	9.55	VI
Arabidopsis lyrata	A.lyrata_ABF2	AL3G32690	459	49913.5	9.55	VI
Arabidopsis thaliana	A.thaliana_ABF2	At1g45249	419	44526.7	9.27	III
Arabidopsis thaliana	A.thaliana_ABF3	At4g34000	454	49677	8.66	VI
Arabidopsis thaliana	A.thaliana_ABF1	At1g49720	392	42509.3	6.94	VI
Arabidopsis thaliana	A.thaliana_ABF4	At3g19290	432	46620.2	9.61	VI
Brassica rapa	B.rapa_ABF2	Brara.J00626	378	40544.6	9.39	III
Brassica rapa	B.rapa_ABF1	Brara.K00967	418	47072.7	9.25	VI
Brassica rapa	B.rapa_ABF7	Brara.A00415	413	45585.5	9.35	VI
Brassica rapa	B.rapa_ABF5	Brara.F00358	368	40341	9.26	VI
Brassica rapa	B.rapa_ABF3	Brara.C03735	355	39283.8	9.13	VI
Brassica rapa	B.rapa_ABF4	Brara.E02271	409	44452.4	9.67	VI
Brassica rapa	B.rapa_ABF6	Brara.A02889	391	42514.4	9.62	VI
Citrus clementina	C.clementina_ABF1	Ciclev10001159m	445	48196.1	9.49	III
Citrus clementina	C.clementina_ABF2	Ciclev10028435m	448	48559.4	9.64	VII
Carica papaya	C.papaya_ABF1	evm.model.supercontig_62.4	422	45243.9	9.69	VII
Citrus sinensis	C.sinensis_ABF1	orange1.1g021624m	310	33707.2	10.13	III
Citrus sinensis	C.sinensis_ABF3	orange1.1g025340m	254	27842.8	10.42	III
Citrus sinensis	C.sinensis_ABF2	orange1.1g013197m	448	48559.4	9.64	VII
Capsella rubella	C.rubella_ABF1	Carubv10009177m	426	45611.3	9.45	III
Capsella rubella	C.rubella_ABF3	Carubv10006251m	448	49306.8	8.72	VI
Capsella rubella	C.rubella_ABF2	Carubv10009399m	389	42499.2	9.24	VI
Capsella rubella	C.rubella_ABF4	Carubv10013729m	438	47240.6	9.56	VI
Cucumis sativus	C.sativus_ABF1	Cucsa.396070	411	44351.8	9.55	III
Cucumis sativus	C.sativus_ABF2	Cucsa.219780	409	44875.7	9.53	VII
Eucalyptus grandis	E.grandis_ABF1	Eucgr.I01145	357	38584.7	9.92	III
Eucalyptus grandis	E.grandis_ABF2	Eucgr.K01706	422	46286	7.04	VII
Eucalyptus grandis	E.grandis_ABF3	Eucgr.J00320	425	46375.2	9.51	VII
Fragaria vesca	F.vesca_ABF1	mrna09110.1-v1.0-hybrid	452	48325.9	9.24	III
Fragaria vesca	F.vesca_ABF2	mrna28250.1-v1.0-hybrid	432	46987.6	9.54	VII
Glycine max	G.max_ABF3	Glyma04G039300	417	45245.8	9.81	III
Glycine max	G.max_ABF4	Glyma06G040400	329	35882.5	10.31	III
Glycine max	G.max_ABF2	Glyma07G213100	419	46108.7	9.74	VII
Glycine max	G.max_ABF1	Glyma02G131700	434	47679.2	9.42	VII
Gossypium raimondii	G.raimondii_ABF2	Gorai.009G212600	430	45983.7	9.44	III
Gossypium raimondii	G.raimondii_ABF1	Gorai.009G275700	405	44159.4	9.55	III
Gossypium raimondii	G.raimondii_ABF5	Gorai.008G024700	426	46334	9.56	VII
Gossypium raimondii	G.raimondii_ABF3	Gorai.013G044500	408	44277.7	8.88	VII
Gossypium raimondii	G.raimondii_ABF4	Gorai.005G237400	388	41969.4	9.34	VII
Manihot esculenta	M.esculenta_ABF2	Manes.18G037900	406	43723.2	9.65	III
Manihot esculenta	M.esculenta_ABF1	Manes.05G174500	416	45292.7	9.75	III
Manihot esculenta	M.esculenta_ABF3	Manes.10G080700	442	48225.2	9.67	VII
Oryza sativa	O.sativa_OsABF2	LOC_Os06g10880	324	34770.8	5.88	IV
Oryza sativa	O.sativa_OsAREB1	LOC_Os02g52780	357	38099.5	9.27	IV
Oryza sativa	O.sativa_OsAREB2	LOC_Os09g28310	367	39373.7	8.98	V
Oryza sativa	O.sativa_TRAB1	LOC_Os08g36790	325	34468	8.64	V
Prunus persica	P.persica_ABF2	Prupe.1G434500	419	44894.4	9.68	III
Prunus persica	P.persica_ABF1	Prupe.8G126600	421	45790.4	9.82	VII
Panicum virgatum	P.virgatum_ABF6	Pavir.J643700	318	33951.7	5.76	IV
Panicum virgatum	P.virgatum_ABF2	Pavir.4KG203500	343	36694.9	9.14	IV
Panicum virgatum	P.virgatum_ABF4	Pavir.5KG630100	356	38486.1	9.27	IV
Panicum virgatum	P.virgatum_ABF3	Pavir.1NG475300	356	38486.1	9.27	IV
Panicum virgatum	P.virgatum_ABF5	Pavir.2NG353900	346	37609.7	6.18	V
Panicum virgatum	P.virgatum_ABF1	Pavir.6NG274900	347	36733.7	8.6	V
Panicum virgatum	P.virgatum_ABF7	Pavir.6KG307800	346	36593.7	6.76	V
Phaseolus vulgaris	P.vulgaris_ABF2	Phvul.009G065500	415	45027.7	9.62	III
Phaseolus vulgaris	P.vulgaris_ABF1	Phvul.003G291800	406	45142.4	9.67	VII
Physcomitrella patens	P.patens_ABF2	Pp3c23_19420V3	450	47233.8	9.25	I
Physcomitrella patens	P.patens_ABF1	Pp3c20_7230V3	364	37668.9	7.96	I
Ricinus communis	R.communis_ABF2	30170.m013868	422	46116.5	9.74	III
Ricinus communis	R.communis_ABF1	29801.m003176	433	47029.9	9.68	VII
Sorghum bicolor	S.bicolor_ABF1	Sobic.010G081800	348	37361.5	9.3	IV
Sorghum bicolor	S.bicolor_ABF3	Sobic.004G309600	346	37551	9.32	IV
Sorghum bicolor	S.bicolor_ABF5	Sobic.002G225100	355	38481.8	6.18	V
Sorghum bicolor	S.bicolor_ABF2	Sobic.008G043900	307	31655.7	6.48	V
Sorghum bicolor	S.bicolor_ABF4	Sobic.007G155900	359	37462.2	6.52	V
Setaria italica	S.italica_ABF3	Seita.4G082000	325	35254.3	9.14	IV
Setaria italica	S.italica_ABF1	Seita.1G331600	354	38153.7	9.27	IV
Setaria italica	S.italica_ABF4	Seita.2G229500	346	37500.6	6.34	V
Setaria italica	S.italica_ABF2	Seita.6G180900	355	37281.1	6.52	V
Selaginella moellendroffii	S.moellendroffii_ABF1	67189	256	27812.3	7.42	II
Selaginella moellendroffii	S.moellendroffii_ABF2	266892	400	42967.8	8.69	II
Solanum lycopersicum	S.lycopersicum_ABF1	Solyc04g078840	447	47977.7	9.42	III
Solanum lycopersicum	S.lycopersicum_ABF4	Solyc01g108080	414	45028.3	9.64	VII
Solanum lycopersicum	S.lycopersicum_ABF3	Solyc11g044560	365	40007.8	8.51	VII
Solanum lycopersicum	S.lycopersicum_ABF2	Solyc10g050210	388	42416.9	9.86	VII
Theobroma cacao	T.cacao_ABF1	Thecc1EG033824	436	46568.4	9.47	III
Theobroma cacao	T.cacao_ABF2	Thecc1EG007074	423	46168.9	9.31	VII
Thellungiella salsuginea	T.salsuginea_TsABF2	JQ971972	394	42535.6	8.92	III
Thellungiella salsuginea	T.salsuginea_TsABF3	JQ971973	450	49544.7	9.06	VI
Thellungiella salsuginea	T.salsuginea_TsABF1	JQ971971	386	41991.9	8.54	VI
Thellungiella salsuginea	T.salsuginea_TsABF4	JQ971974	432	46718.3	9.73	VI
Triticum aestivum	T.aestivum_ABF1	TraesCS5A01G237200	354	35492.5	7.75	V
Triticum aestivum	T.aestivum_ABF2	TraesCS7A01G170600	343	38424.8	9.74	IV
Triticum aestivum	T.aestivum_ABF3	TraesCS6A01G333600	340	38463.3	6.88	IV
Vitis vinifera	V.vinifera_ABF1	GSVIVT01009485001	263	28375.4	9.65	III
Zea mays	Z.mays_ABF4	GRMZM2G033413	349	37308.3	8.59	IV
Zea mays	Z.mays_ABF2	GRMZM2G479760	354	37837.5	9.92	IV
Zea mays	Z.mays_ABF1	GRMZM2G002075	295	32164.7	7.43	V
Zea mays	Z.mays_ABF5	GRMZM2G157722	351	37333.1	5.44	V
Zea mays	Z.mays_ABF3	GRMZM2G478417	361	37731.6	7.23	V
