# Supplementary material for: Genome-wide analysis of the AREB/ABF gene lineage in land plants and functional analysis of TaABF3 in Arabidopsis
Source: BMC Plant Biol. 2020 Dec 10;20:558. doi: 10.1186/s12870-020-02783-9 (PMC7731569; doi:10.1186/s12870-020-02783-9)
Supplement: Supplementary file 9 — Additional file 9: Table S2. Primers used in this research. [file 12870_2020_2783_MOESM9_ESM.xlsx]

## Sheet: Sheet1
Additional file 9: Table S2 Primers used in this research.
The name of the primers was based on the gene name and experimental purpose.
Primer Name	Gene ID	Forward	Reverse
B.rapa_ABF1_qRTPCR	Brara.K00967	TGATGAAGGAGGATGACACTG	TGCCAAATCCATAGAACCC
B.rapa_ABF2_qRTPCR	Brara.J00626	GGTGCCGAGACTGTGAATC	TCTTATCCCAGGACCAACG
B.rapa_ABF3_qRTPCR	Brara.C03735	AAGGGCTAGGCTTTGGAT	CCTCTGGTGCTGATGCTG
B.rapa_ABF4_qRTPCR	Brara.E02271	GGGATTAGGCTTTGAGTTTG	ACTGCTGTTGTGGCTGTTG
B.rapa_ABF5_qRTPCR	Brara.F00358	CCAAAGCAAGCGAATGTAA	CCTTCTCCACCACTCCTGTA
B.rapa_ABF6_qRTPCR	Brara.A02889	GGGGAAGGAAGTAACCAGA	CATGTTCATCGACCCAAAA
B.rapa_ABF7_qRTPCR	Brara.A00415	GACGACGCAAAGCAACCA	CAAAGTCCTTCCCAACCC
G.max_ABF1_qRTPCR	Glyma02G131700	TAGCCTACTTCTTGGGTTTC	TGGTGGTGGATGTTGTTG
G.max_ABF2_qRTPCR	Glyma07G213100	AGGGTTGATTGGAGTTGC	TTGATTACATAATGCGGTGA
G.max_ABF3_qRTPCR	Glyma04G039300	CGCGTTGGGAATAATAGTGG	TGTGGCTGCTGATTGGATGT
G.max_ABF4_qRTPCR	Glyma06G040400	TGTCTCGCGTTGGGAATAA	TGGACTCTGCATCTGTGGC
O.sativa_OsABF2_qRTPCR	LOC_Os06g10880	AGCAGGTGGAAATGATACAGAAGCAAA	CCAGTCAGTGTTCGTCGGAGGC
O.sativa_OsAREB1_qRTPCR	LOC_Os02g52780	AGCAGGATGAAATGTTGGAGCAGC	CGTCAGAGTCCTCCGAAGGCAAAT
O.sativa_OsAREB2_qRTPCR	LOC_Os09g28310	AAGACGGTGGACGAGGTATGGC	GGCGCAGCGGGTGGATTTT
O.sativa_TRAB1_qRTPCR	LOC_Os08g36790	GGAAGGATTTCGGGTCGATGA	TCGCTCTAAGTCCCGCCACA
Z.mays_ABF1_qRTPCR	GRMZM2G002075	TACGGCAGCGGTAGGGTTTG	GCTGTATCCCTTCCCGACAGAA
Z.mays_ABF2_qRTPCR	GRMZM2G479760	TGGTGCCTCCACTGCAATTCGG	TGACAAGTCGTCTCCCTCCATCTTCC
Z.mays_ABF3_qRTPCR	GRMZM2G478417	TCCTGGTATAAGTGGTAAGGTTATGGTT	TGGATGAACAGCGGAGGGTC
Z.mays_ABF4_qRTPCR	GRMZM2G033413	CGCTCACGTTCGACGAGTTCCA	TCCTCGGCTGTCCAGATGTTGC
Z.mays_ABF5_qRTPCR	GRMZM2G157722	CAGCTAGATCCCGTGCCCGTAA	CCGCAGGCATCGCTTCTTTT
TaABF1_cloning	TraesCS5A02G237200	ATGGACTTCAGGAGCAGCAAC	TCACCAGGGGCCGGTCAACGTTCTT
TaABF2_cloning	TraesCS7A02G170600	ATGGAGATGCCGGGAGGGA	CTACCACGGACCGGTCAGCGTT
TaABF3_cloning	TraesCS6A01G333600	ATGGATTTTCCGGGAGGGAG	CTATTTTTCTTTTCCTTCCAAGAGC
TaABF1_qRTPCR	-	GGAGATGACCCTGGAGGAGTT	AAGGGCCTTTAGGGACAACA
TaABF2_qRTPCR	-	CGGATGACGCTGGAGGAGT	ACATTGCCCTGAGGGAACA
TaABF3_qRTPCR	-	CTCCGATGGTGAATCCTCTGT	TTGCCGTAGCCGTTGGACAT
